# Supplementary material for: Lowering LDL cholesterol reduces cardiovascular risk independently of presence of inflammation
Source: PubMed Central journal article supplement (PMC5978933; doi:10.1016/j.kint.2017.09.011), 2018-04
Supplement: mmc2.pdf [file mmc2.pdf]

**Supplementary Table S1: Association between C-reactive protein and LDL-cholesterol and major vascular events at high and low levels of LDL-C/CRP**

|                                                              | <b>HR (95% CI)</b> |
|--------------------------------------------------------------|--------------------|
| CRP, per 3x higher usual level* (adjusted for LDL-C)         |                    |
| Low LDL-C                                                    | 1.22 (1.10-1.35)   |
| High LDL-C                                                   | 1.39 (1.24-1.56)   |
| Overall                                                      | 1.29 (1.19-1.39)   |
| LDL-C, per 0.6 mmol/L higher usual level† (adjusted for CRP) |                    |
| Low CRP                                                      | 1.15 (1.03-1.27)   |
| High CRP                                                     | 1.18 (1.08-1.30)   |
| Overall                                                      | 1.17 (1.09-1.25)   |

CRP=C-reactive protein. LDL-C=LDL-cholesterol. HR=hazard ratio. CI=confidence interval. All analyses adjusted for age, sex, ethnicity, treatment allocation, prior diabetes, prior vascular disease, smoking, BMI, HDL cholesterol and renal status. \*Average HR per 3x higher usual CRP across range of values studied (i.e. assuming a log-log-linear relationship). Tests for differences between slopes in LDL-C subgroups:  $\chi^2=3.25$ ;  $p=0.07$ . †Average HR per 0.6 mmol/L higher usual LDL-C across range of values studied (i.e. assuming a log-linear relationship). Tests for differences between slopes in CRP subgroups:  $\chi^2=0.19$ ;  $p=0.67$ .
