# Supplementary material for: Lowering LDL cholesterol reduces cardiovascular risk independently of presence of inflammation
Source: PubMed Central journal article supplement (PMC5978933; doi:10.1016/j.kint.2017.09.011), 2018-04

**Supplementary figure S4: Effect of allocation to simvastatin plus ezetimibe on major vascular events, by level of C-reactive protein and dialysis status**

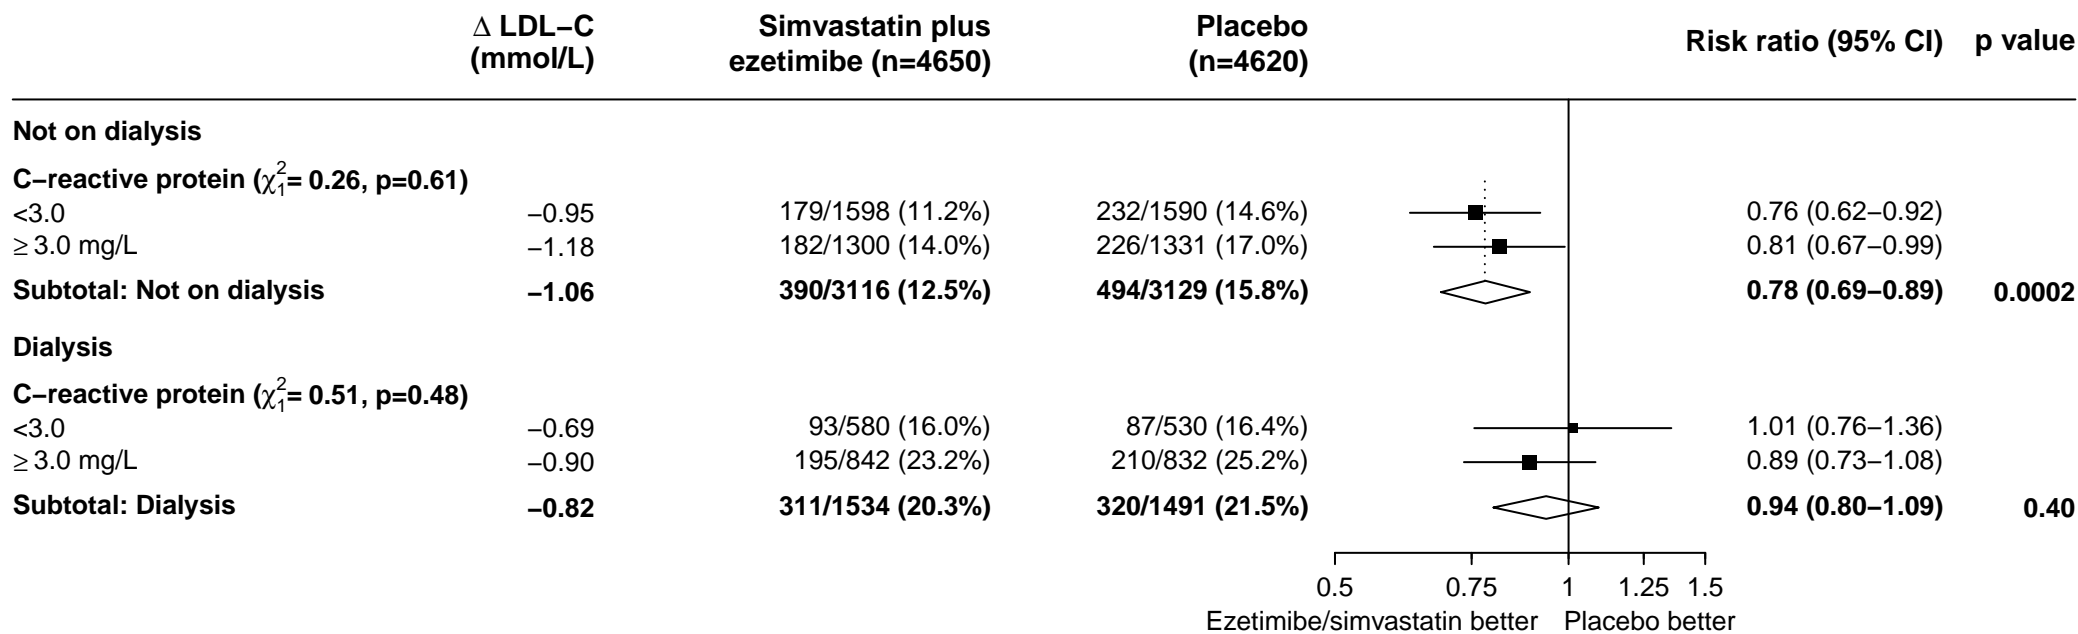

Supplement: mmc6.pdf [file mmc6.pdf]
